# Supplementary material for: H7N9 Influenza Virus Containing a Polybasic HA Cleavage Site Requires Minimal Host Adaptation to Obtain a Highly Pathogenic Disease Phenotype in Mice
Source: MDPI journal article supplement (doi:10.3390/v12010065), 2020-01-05
Supplement: s1 [file s1]

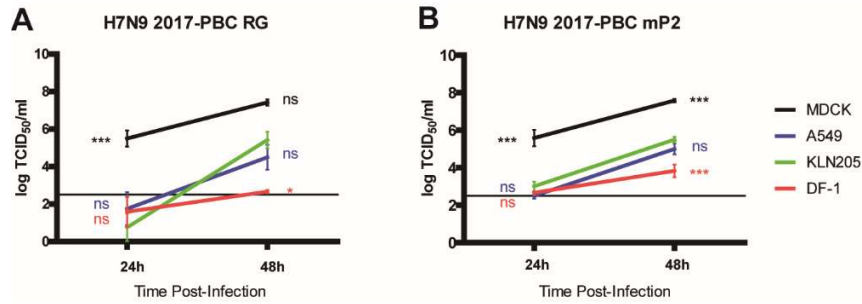

**Figure S2.** Growth of (A) non-passaged H7N9 2017-PBC RG and (B) mouse-passaged H7N9 2017-PBC mP2 influenza viruses in mammalian cell lines. Viral replication was determined in canine kidney (MDCK), human lung (A549), mouse lung (KLN 205), and chicken fibroblast (DF-1) cell lines at 24 and 48 hours post-infection with 0.5  $\mu\text{g/ml}$  TPCK-trypsin supplemented into the culture medium. Viral titers were determined by TCID<sub>50</sub> assay using MDCK cells with 1.0  $\mu\text{g/ml}$  TPCK-trypsin in the medium. Dotted line on each graph represents the limit of detection of the TCID<sub>50</sub> assay. Mean viral titers and standard error of mean are shown, 2-Way ANOVA with Bonferroni post-tests was performed comparing all results to KLN 205 at each time point, ns = not significant, \* or \*\* or \*\*\* denotes p-values of < 0.05, or < 0.01, < 0.001, respectively.
