# Supplementary material for: H7N9 Influenza Virus Containing a Polybasic HA Cleavage Site Requires Minimal Host Adaptation to Obtain a Highly Pathogenic Disease Phenotype in Mice
Source: MDPI journal article supplement (doi:10.3390/v12010065), 2020-01-05
Supplement: s1 [file s1]

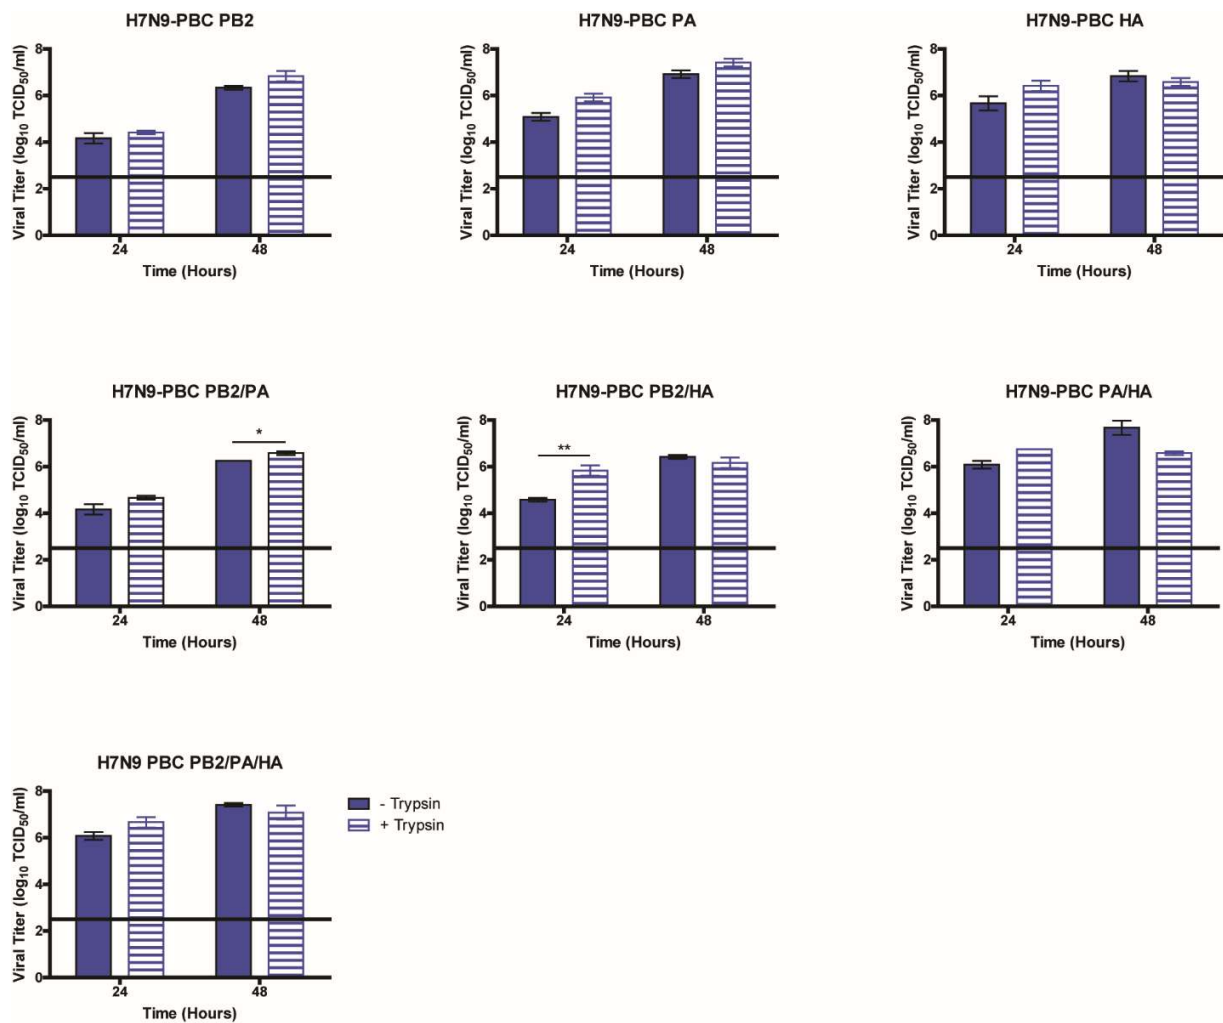

**Figure S1.** Trypsin dependent growth of H7N9-PBC viruses containing mutations in either PB2, PA, or HA. MDCK cells were infected with each virus at a MOI of 0.001, with 1 µg/ml of trypsin supplemented to the growth medium (+ Trypsin) or without (- Trypsin). Viral titers were determined at 24h and 48h post-infection by TCID<sub>50</sub> assay. Dotted line on each graph represents the limit of detection of the TCID<sub>50</sub> assay. Mean viral titers and standard error of mean (SEM) are shown, 2-Way ANOVA with Bonferroni post-tests was performed, \*p-value < 0.05, and \*\*p-value < 0.01.
